1 **Bacterial community response to species overrepresentation or omission is**  
2 **strongly influenced by life in spatially structured habitats**

3

4 Kleyer, Hannah<sup>1</sup>, Tecon, Robin<sup>1,2</sup> and Or, Dani<sup>1,3</sup>

5

6 <sup>1</sup>Soil and Terrestrial Environmental Physics, Department of Environmental Systems Science,  
7 Swiss Federal Institute of Technology in Zurich (ETH Zürich), Universitätstrasse 16, 8092  
8 Zürich, Switzerland

9 <sup>2</sup>National Centre of Competence in Research (NCCR) Microbiomes, University of Lausanne,  
10 Biophore Building, 1015 Lausanne, Switzerland

11 <sup>3</sup>Division of Hydrologic Sciences, Desert Research Institute, Reno, NV, USA

12

13

14 Running title: Habitat structure affects bacterial assembly

15

16 Keywords: bacterial interactions, absolute quantification, real-time PCR, fluidigm, porous  
17 media

18 **Abstract**

19 Variations in type and strength of interspecific interactions in natural bacterial communities  
20 (e.g., synergistic to inhibitory) affect species composition and community functioning. The  
21 extent of interspecific interactions is often modulated by environmental factors that constrain  
22 diffusion pathways and cell mobility and limit community spatial arrangement. We studied how  
23 spatially structured habitats affect interspecific interactions and influence the resulting bacterial  
24 community composition. We used a bacterial community made of 11 well-characterized species  
25 that grew in porous habitats (comprised of glass beads) under controlled hydration conditions  
26 or in liquid habitats. We manipulated the initial community composition by overrepresenting  
27 or removing selected members, and observed community composition over time. Life in porous  
28 media reduced the number and strength of interspecific interactions compared to mixed liquid  
29 culture, likely due to spatial niche partitioning in porous habitats. The community converged to  
30 similar species composition irrespective of the initial species mix, however, the dominant  
31 bacterial species was markedly different between liquid culture and structured porous habitats.  
32 Moreover, differences in water saturation levels of the porous medium affected community  
33 assembly highlighting the need to account for habitat structure and physical conditions to better  
34 understand and interpret assembly of bacterial communities. We point at the modulation of  
35 bacterial interactions due to spatial structuring as a potential mechanism for promoting  
36 community stability and species coexistence, as observed in various natural environments such  
37 as soil or human gut.

38

## 39 **Importance**

40 Bacteria live as complex multispecies communities essential for healthy and functioning  
41 ecosystems ranging from soil to the human gut. The bacterial species that form these  
42 communities can have positive or negative impact on each other, promoting or inhibiting each  
43 other's growth. Yet, the factors controlling the balance of such interactions in nature, and how  
44 these influence the community, are not fully understood. Here, we show that bacterial  
45 interactions are modified by life in spatially structured bacterial habitats. These conditions exert  
46 important control over the resulting bacterial community regardless of initial species  
47 composition. The study demonstrates limitations of inferences from bacterial communities  
48 grown in liquid culture relative to behaviour in structured natural habitats such as soil.

## 49 **Introduction**

50 Advances in high-throughput sequencing uncovered vast diversity of microbiomes present in  
51 all ecosystems: from soils (Bahram et al 2018, Delgado-Baquerizo et al 2018) and oceans  
52 (Ibarbalz et al 2019), to plants and animals (Bai et al 2015), to humans (Costea et al 2018) and  
53 urban habitats (Afshinnkoo et al 2015). The important roles that microorganisms play in  
54 ecosystem functioning and health have prompted interest in better understanding microbial  
55 assembly, stability and activity, towards improved prediction and control of community  
56 formation and function (Lawson et al 2019, Widder et al 2016). Resolving the mechanisms that  
57 support coexistence of diverse species within a shared environment is particularly challenging,  
58 as are the balance of interactions within multispecies assemblages (Little et al 2008) and how  
59 such interactions are influenced by habitat characteristics.

60 Simple experimental ecosystems yield new insights through systematic hypotheses  
61 testing and controlled evaluation of theoretical concepts (Cairns et al 2018, Carlström et al  
62 2019, Chodkowski and Shade 2017, Friedman et al 2017, Meroz et al. 2021, Kehe et al 2019,  
63 Voges et al 2019). Such approaches have confirmed several essential drivers of community  
64 assembly and species interactions, notably the nature and availability of nutrient and carbon  
65 resources (Enke et al 2019, Fu et al. 2020, Goldford et al 2018), population density (Abreu et al  
66 2019), rates of migration (Gokhale et al 2018), and how environmental toxicity affects  
67 functionality (Piccardi et al 2019). The role of microbial habitat spatial structure has received  
68 comparatively less attention, despite well-established understanding in ecological theory that  
69 spatially structured environments influence biodiversity, interactions and species coexistence  
70 (Nadell et al 2016, Tilman 1994). A few experimental and modelling studies have shown that  
71 microhabitat spatial structure could stabilize simple assemblages of 2-3 bacterial species that  
72 would not coexist in mixed cultures due to competitive exclusion (Borer et al 2018, Kim et al  
73 2008, Lowery and Ursell 2019, Wang and Or 2013). Therefore, spatial habitat heterogeneity

74 affects bacterial community dynamics in ways irreproducible in homogeneous (liquid) habitats.  
75 Here, we hypothesize that spatially structured habitats, such as found in soil and other porous  
76 media, dominate the nature of bacterial interactions in space and thus exert a significant  
77 influence on bacterial community dynamics. More specifically, porous domains that are  
78 partially water-saturated constrain nutrient fluxes and interspecies competition thus providing  
79 specific life conditions different from well-mixed habitats (Ebrahimi and Or 2015, Tecon et al  
80 2018, Wang and Or 2013). To test this hypothesis, we have used a simplified bacterial  
81 community of 11 species (Kleyer et al 2019) in replicate microcosms supplied with the same  
82 nutrient resources but with variation in spatial structure and hydration state (Fig. 1). The porous  
83 habitats comprised of glass beads were set at controlled hydration states from wet to relatively  
84 dry, while liquid media without beads served as contrasting unstructured habitats. The synthetic  
85 community comprises 11 members from phyla commonly found in soil (*Proteobacteria*,  
86 *Actinobacteria* and *Firmicutes*). Functional traits with relevance for the soil environment  
87 include decomposition of organic matter, nutrient cycling, and maintenance of soil fertility. In  
88 particular, the community members play an important role in nitrogen fixation (*Paenibacillus*  
89 *sabinae*, *Pseudomonas stutzeri*, *Rhizobium etli*, *Xanthobacter autotrophicus*), are involved in  
90 bioremediation of different components like phenols (*Arthrobacter chlorophenolicus*  
91 (Westerberg et al 2000)), polychlorinated biphenyl (PCB) (*Burkholderia xenovorans* (Liang et  
92 al 2014)), polycyclic aromatic hydrocarbons (PAHs) (*Pseudomonas stutzeri* (Singh et al 2017))  
93 and halogenated hydrocarbons (*Xanthobacter autotrophicus*). We added *Escherichia coli* as  
94 non-soilborne species to the community as *E. coli* often ends up in the environment as faecal  
95 contaminant (Brennan et al 2010). All members can grow aerobically and some are able to enter  
96 dormancy by forming spores (*Bacillus subtilis*, *Paenibacillus sabinae*, and *Streptomyces*  
97 *violaceoruber* (Brenner et al (2005))). Thus, the selected synthetic community covers a wide  
98 phylogenetic range and combines bacterial species with different life strategies. To uncover  
99 interactions within this community, we manipulated the initial composition of the inoculum by

100 systematically over representing one species at a time. Our working hypothesis was that  
101 spatially structured habitats would select for a bacterial community composition that differs  
102 from liquid culture habitats, moreover, we predicted that the resulting community composition  
103 in structured habitats would be marginally affected by the initial inoculum with overrepresented  
104 species. To elucidate the types of interactions (bacterial competition or facilitation), we  
105 selectively removed species from the inoculum (one at a time). Our high-throughput system  
106 and the modular approach using defined species and habitats is well suited for disentangling  
107 abiotic factors and identifying interspecies interactions, the two key components for  
108 scrutinizing mechanisms of bacterial community assembly.

109

## 110 **Results**

### 111 *Convergence of bacterial community composition in structured habitats*

112 We manipulated the initial composition of the synthetic bacterial community inoculum  
113 (Supplementary Table S2) by targeted overrepresentation and omission of selected members  
114 and followed the development of community composition growing in an unstructured batch  
115 habitat and structured microcosms kept under ‘wet’ and ‘dry’ conditions (Fig. 1). The absolute  
116 abundance for each community member, estimated by the number of species ‘genome  
117 equivalents’ ( $\approx$ number of bacterial cells, see *Materials and Methods*) in each microcosm shows  
118 an increase of the total community under all conditions from inoculation to 2 days and further  
119 at 6 days of incubation (Fig. 2). The resulting species abundance varied by several orders of  
120 magnitude from virtually undetected to  $8 \times 10^8$  cells per microcosm (representing  $3.2 \times 10^9$  cells  
121 per g glass beads) for the most abundant species (Fig. 3). Community composition in all  
122 microcosms were dominated by gammaproteobacteria (*Pseudomonas protegens*, *Pseudomonas*  
123 *stutzeri*, *Escherichia coli*), irrespective of time or initial species ratio (Fig. 3). Remarkably, the  
124 absolute and relative abundance of these three dominant species was consistent across replicates

125 and determined primarily by the presence or absence of microcosm spatial structure and by the  
126 hydration status of structured habitats. While *P. protegens* and *E. coli* dominated liquid batch  
127 microcosms, *P. stutzeri* was the most abundant species in microcosms containing glass beads,  
128 with this trend increasing over time (Fig. 3). The marked changes in relative abundance of  
129 dominant species between structured and non-structured microcosms seem to be controlled by  
130 the growth of *P. stutzeri*, whose abundance was poor in batch ( $10^4$ - $10^5$ ) but highest of all species  
131 in glass bead microcosms both under wet or dry conditions ( $\approx 10^8$ , an increase of 3-4 orders of  
132 magnitude). Spearman's rank correlations between the Bray-Curtis similarities of microbial  
133 community composition in all samples confirmed *P. stutzeri* as main driver for the observed  
134 patterns (73 %). Importantly, the divergence of community compositional patterns observed in  
135 structured and non-structured microcosms was not driven by the total size of the bacterial  
136 community, which was highest in wet structured habitats (up to  $10^9$  cells per microcosm) and  
137 similarly lower in liquid and dry structured habitats (Figs. 2A and 3). Principal coordinate  
138 analysis (PCoA) of Bray-Curtis dissimilarities (Fig. 2B) shows a distinct cluster of bacterial  
139 communities from liquid habitats separated from communities in structured microcosms. The  
140 structured habitats communities were grouped based on hydration condition ('wet' and a 'dry'  
141 clusters). Additionally, the different sampling times (2 days and 6 days) formed delimited sub-  
142 clusters within their respective hydration conditions (Fig. 2 B). High similarity of community  
143 structure within the same habitat at 2 and 6 days are further confirmed by ANOSIM pairwise  
144 comparison of each habitat and time point (Fig. 2 C). Moreover, ANOSIM statistics also  
145 underscore strong differences in community structure between batch culture incubation and  
146 communities from structured microcosm habitats.

147

#### 148 *Manipulation of initial species ratio has limited effects on community convergence*

149 The overrepresentation of individual species in the initial inoculum (Fig. 1) did not affect the  
150 overall dominance of gammaproteobacteria in unstructured and structured habitats (Fig. 3A).

151 While overrepresentation resulted in significant changes in community composition, those  
152 changes were transient and waned or disappeared after 6 days of incubation (most notably in  
153 the case of *P. stutzeri*, *P. protegens*, *E. coli* and *Burkholderia xenovorans*). After 6 days, the  
154 relative abundance patterns of the dominant species were virtually unaffected by a 100-fold  
155 increase in initial abundance of each species compared to the others, with the exception of *P.*  
156 *protegens* that persisted at high abundance at 2 and 6 days when overrepresented in structured  
157 habitats (Fig. 3A). Similarly, in most cases the patterns of dominant species persisted despite  
158 omission of selected species in the initial inoculum. Nevertheless, marked changes occurred  
159 when one of the members of the dominant trio of gammaproteobacteria was removed (Fig. 3B).  
160 Specifically, the removal of *P. stutzeri* in structured habitats led to increased *P. protegens*  
161 growth and relative abundance, which produced a pattern similar to that of liquid habitats.  
162 *Arthrobacter chlorophenolius* was also stimulated by the removal of *P. stutzeri*, but only in dry  
163 structured habitats, and the effect was no longer visible after 6 days. *P. protegens*, once removed  
164 from liquid habitats, was replaced by a diversity of other species (*P. stutzeri*, *E. coli*, *A.*  
165 *chlorophenolicus*, *B. xenovorans*, *Bacillus subtilis*) with high reproducibility among replicate  
166 microcosms (Fig. 3B).

167

### 168 *Signatures of initial species overrepresentation persists in structured habitats*

169 We systematically tested the consequences of a 100-fold increase of one species over the others,  
170 one species at a time, in the mix inoculum. Although the relative abundance patterns of  
171 dominant species persisted, as discussed above, imprints of this initial manipulation of  
172 community composition were detected in the absolute abundance counts. These compositional  
173 signatures were prominent in structured habitats (wet and dry), exhibiting a ‘staircase’ pattern  
174 of absolute abundance heatmap (Fig. 3A). Two days after inoculation, this imprint was visible  
175 for all 11 species in the community in structured habitats, whereas in liquid habitats its  
176 persistence was limited to five species (*P. stutzeri*, *A. chlorophenolicus*, *B. xenovorans*, *B.*



177 *subtilis* and *Xanthobacter autotrophicus*, Fig. 3A). Moreover, this characteristic pattern was  
178 confirmed by the analysis of significant effects of one species initial overrepresentation over  
179 the same species final abundance (Fig. 4A and Supplementary Fig. S2) with significant increase  
180 for all 11 overrepresented community members ( $p < 0.05$ ) in structured wet habitats (Fig. S2).

181

### 182 *Species overrepresentation or removal from inoculum uncovers interspecific interactions*

183 We further analyzed the absolute counts data to identify causal relationships between the  
184 overrepresentation or omission of a given species and the absolute increase or decrease of  
185 another bacterial species abundance (measured as number of genome equivalents), which we  
186 define here respectively as positive and negative effects. We compared species abundances in  
187 microcosms inoculated with uneven initial species mixtures with abundances in microcosms  
188 inoculated with an even mix of species serving as a control (Fig. 1B), for each treatment and  
189 time point. Selected results presented in Fig. 4 (and full results in Supplementary Fig. S2) show  
190 the detected changes in the abundance of one species with respect to the control (with a >5-fold  
191 change threshold contingent to a  $p$ -value < 0.05). The total number of detected positive and  
192 negative effects in liquid habitats was higher than in structured habitats in both cases of species  
193 overrepresentation and omission (Fig. 4 and Supplementary Fig. S2). While the number of  
194 detected positive effects increased with time in liquid habitats, it decreased in structured habitats  
195 (Fig. 4). Negative effects (i.e., decrease in another species' abundance) were observed for one  
196 single case in liquid habitats at day 2 (decrease of *B. subtilis* in response to overrepresentation  
197 of *P. protegens*), but were frequent in structured habitats, especially after 6 days (Fig. 4 and  
198 Supplementary Fig. S2). Results obtained from species omission suggested more and stronger  
199 competitive interactions in liquid than in structured habitats (Fig. 4B and Supplementary Fig.  
200 S2). After 6 days in liquid, the removal of *P. protegens* had permitted significant growth  
201 increase in five other species: *A. chlorophenolicus*, *B. subtilis*, *B. xenovorans*, *E. coli* and *P.*  
202 *stutzeri*, but this was not the case in structured habitats (Fig. 4B and Supplementary Fig. S2).

203 We identified a number of reciprocal responses to overrepresentation and omission, that is,  
204 instances where a species both increased in absence and decreased in overrepresentation of  
205 another species (or vice versa): *E. coli* in response to *S. violaceoruber* and *X. autotrophicus*  
206 (wet structured); *A. chlorophenolicus* in response to *P. stutzeri* (dry structured); *B. subtilis* in  
207 response to *P. protegens* (liquid).

208

## 209 **Discussion**

210 The study highlights dynamic adjustments in species composition of a well-defined bacterial  
211 community (Fig. 1) grown in different habitats with two distinctly different outcomes: (1) a  
212 community dominated by *P. protegens* for liquid habitat; or (2) a community dominated by *P.*  
213 *stutzeri* in porous and structured habitat (Fig. 3). Under all conditions gammaproteobacteria  
214 dominated the microcosms, which suggested a faster or more efficient use of the nutrients  
215 available in the growth medium. However, the difference between (1) and (2) could not be  
216 attributed to nutrient resources (invariant across microcosms), nor to the total growth of the  
217 community (Fig. 2A). We propose that, to account for this discrepancy, the nature of the habitat  
218 is the primary determining factor (i.e., the presence or absence of physical structure with  
219 microscopic spatial arrangement of habitats) (Fig. 3A). Generally, the results supported the  
220 hypothesis that spatially structured habitats exert strong influence on growth, interactions and  
221 assembly of bacterial communities. Additionally, the nature of the habitat and interactions is  
222 not only determined by the solid phase (glass beads), but by the hydration state (aqueous phase)  
223 as well. The organization of the aqueous phase near water saturation ('wet') or under relatively  
224 drier conditions ('dry') had a significant influence on species abundance. With 'wet' porous  
225 habitats giving rise to bacterial community composition similar to liquid habitats, with higher  
226 abundances of *P. protegens* and *E. coli* and lower abundance of *A. chlorophenolicus* (Fig. 2A).  
227 This result emphasizes the importance of aqueous phase organization on habitat connectivity

228 and community composition, as also supported by previous experimental and modelling studies  
229 (Borer et al 2019, Kim and Or 2017, Kleyer et al 2019).

230 The use of a synthetic bacterial community enabled systematic manipulation of initial  
231 species composition in microcosms (i.e., with 100-fold relative increase or removal of  
232 individual species, Fig. 1). Our results showed that irrespective of initial bacterial species ratio,  
233 the community composition drifted from an initially even abundance to similar patterns  
234 dominated by *Pseudomonas* species. Even after 6 days, the initial differences in species ratio  
235 did not alter the relative abundance patterns with respect to the most abundant species in the  
236 community (except when the dominant species *P. protegens* or *P. stutzeri* were omitted from  
237 the inoculum) (Fig. 2). Remarkably, the imprint of initially overrepresented bacterial species  
238 was preserved in communities grown in porous media with structured habitats (Fig. 2A, Fig.  
239 4A, and Supplementary Fig. S2). This suggests that physical structure and aqueous habitats  
240 forming between glass beads may either stimulate species growth or reduce interspecific  
241 interactions irrespective details of the hydration status. This translates to a stabilizing effect of  
242 structured environments that preserves initial community composition for extended periods  
243 relative to community composition in liquid culture with potential implications for engineering  
244 stable microbial communities (Ben Said et al 2020, Lindemann et al 2016).

245 In addition to bacterial-habitat interactions, we seek insights on interspecific  
246 interactions that shape community composition and the roles of community members and their  
247 collective functioning. Selective initial overrepresentation or omission triggered significant  
248 changes in different species' final abundances (Figs. 2 and 4). In a background of similar  
249 resource availability, we link these changes to the onset of competitive or facilitative  
250 interactions between various species during growth (Bruno et al 2003, Ghoul and Mitri 2016).  
251 Competition is expected to dominate interactions in our system, because all species grow  
252 independently to high cell densities in the complex liquid medium (a nutritious mix of protein  
253 digests with glucose and mannitol as additional carbon sources) (Kleyer et al 2019). This is

254 supported by the drift from an initially even community composition to a highly uneven  
255 composition observed in all treatments after 2 days, with gammaproteobacteria out-competing  
256 other phyla (Fig. 2). It is further supported by the omission of one of those dominant species  
257 resulting in higher abundances of similar competitors, notably the replacement of *P. protegens*  
258 by *P. stutzeri* and vice versa (the two *Pseudomonas* species are closely related phylogenetically  
259 and share certain traits such as fast growth on rich media) (Fig. 4B). In addition to competing  
260 for nutrients and space, the bacterial species in the community might also directly antagonize  
261 each other (Little et al 2008). *P. protegens*, in particular, is known to secrete a variety of  
262 antimicrobial metabolites (Ramette et al 2011) and possesses a Type VI secretion system that  
263 is involved in contact-dependent elimination of competitors (Vacheron et al 2019). Such  
264 antagonizing mechanisms could potentially also explain the marked effects of *P. protegens*  
265 omission in liquid cultures (Fig. 4B). By contrast, facilitation (e.g., metabolic cross-feeding  
266 between species) is less expected considering that the growth medium is complex (thus  
267 obscuring trophic dependencies (D'Souza et al 2018)) and non-toxic (Piccardi et al 2019).  
268 Overall, our results from species omission experiments supported these expectations on the  
269 nature of interactions in our system (Fig. 4B, Supplementary Fig. S2). The use of a synthetic  
270 ecology approach was here decisive to clearly disentangle species interactions from habitat  
271 filtering (Ghoul and Mitri 2016, Vorholt et al. 2017); the impossibility to do so remains an  
272 inherent limitation in network analyses of microbial communities from natural habitats  
273 (Röttjers and Faust 2018).

274         The number of detected changes suggesting species interactions was overall higher and  
275 largely positive in liquid compared to structured habitats (Fig. 4 and Supplementary Fig. S2).  
276 We found that in response to species overrepresentation in liquid habitats, other  
277 phylogenetically distant members exhibited an increase in abundance (e.g., increase of *B.*  
278 *subtilis* or *B. xenovorans* facilitated growth of five community members from four different  
279 phyla), which could indicate potential cross-feeding due to metabolic dissimilarities. Somewhat

280 surprising are results from species omission that suggest prevalence of facilitative interactions  
281 in structured habitats, while results from species overrepresentation suggested the converse  
282 (Fig. 4 and Supplementary Fig. S2). However, we note that overrepresenting and omitting  
283 species are not strictly symmetrical manipulations, and in that context we consider species  
284 omission to be a more definitive arbiter in determining species interactions (see also for  
285 example Gutiérrez and Garrido, 2019).

286         Importantly, our results demonstrate that porous and structured microhabitats modulate  
287 the number, type and strength of interspecies interactions. These effects have been previously  
288 suggested for small bacterial assemblages of 2-3 species (Borer et al 2018, Kim et al 2008). As  
289 noted above, most natural habitats harbour complex spatial structures that likely mitigate  
290 competitive effects. This understanding challenges a widespread (albeit debated) view that  
291 competition dominates interactions among microorganisms in nature (Foster and Bell 2012).  
292 We surmise that the experimental reliance on liquid cultures to study microbial interaction  
293 processes may overemphasize the prevalence of interspecies competition within microbial  
294 communities in nature (Foster and Bell 2012, Rivett et al 2016).

295         The role of spatial structures highlights certain limitations of the widespread use well-  
296 mixed liquid media to study bacterial interactions and community assembly. The simplicity and  
297 reproducibility offered by such media comes with a bias of the behaviour of such communities  
298 in natural and structured environments (i.e., soil or human gut). These differences are rooted in  
299 the complex spatial arrangement of solids, liquid and gas phases at the microscale and their  
300 impacts on the diffusion, motility and interspecific interactions in most natural environments  
301 (Tecon and Or 2017, Vos et al 2013). Consequently, we argue that the physical spatial structures  
302 of microbial habitats is a central element necessary for any accurate prediction of bacterial  
303 community dynamics and stability, alongside well recognized factors such as the type and  
304 diversity of carbon sources (Goldford et al 2018, Zegeye et al 2019).

305           Arguably, a fundamental goal of microbial ecology is to uncover the ecological  
306 mechanisms that permit the coexistence of many diverse species within a shared environment  
307 (Tilman 1982). Among the identified mechanisms, niche partitioning is often predicted to play  
308 a major role (Saleem et al 2015). Niche partitioning can refer to differential use of resources  
309 ('ecological' or 'metabolic' niche) (Saleem et al 2015) and to segregation in distinct spatial  
310 areas ('spatial' niche) (Ghoul and Mitri 2016). We conclude from our results that the latter is  
311 more likely to be at play in structured microcosms (containing glass beads at various hydration  
312 states), hence supporting species coexistence. In general, when considering that many natural  
313 habitats are porous media (notably, soil) characterized by physico-chemical gradients and  
314 spatial structures, we may contemplate a vast diversity of spatial niches arising that are absent  
315 in liquid environments (Bickel and Or 2020, Raynaud and Nunan 2014, Tecon and Or 2017).  
316 As noted above, spatial structuring leads to another complementary mechanism promoting  
317 bacterial species coexistence: the abatement of strong ecological interactions (positive or  
318 negative) between species that perturb the community. This mechanism was notably proposed  
319 to account in part for the observed stability of the human gut microbiome (Coyte et al 2015).

320           Results presented here underscore the crucial role of habitat structure, key for our  
321 understanding of processes in natural bacterial communities inhabiting heterogeneous  
322 environments where structures define and stabilize composition and dynamics that essentially  
323 impact community functioning (e.g. gut- and soil microbiota). Lasting effects from directed  
324 manipulation of bacterial community composition are fundamental for communities used as  
325 probiotics, in food production or for environmental restoration, remediation and in biocontrol.  
326 Linking effects of hydration and the physical spatial structure with dynamics in a defined  
327 bacterial community offers a useful tool in sustainable engineering of community composition.  
328

## 329 **Materials and Methods**

### 330 *Bacterial strains, culture conditions and synthetic community assembly*

331 We assembled a synthetic bacterial community comprised of 11 species listed in Fig. 1.  
332 Bacterial strains were obtained from the Leibniz-Institute German collection of microorganisms  
333 (DSMZ): A6 (DSM12829), 168 (DSM402), LB400 (DSM17367), MG1655 (DSM18039),  
334 DSM20030, T27 (DSM17841), CHA0 (DSM19095), CMT.9.A (DSM4166), CFN 42  
335 (DSM11541), A3(2) (DSM40783), 7C (DSM432). All bacterial strains were cultured on 0.1x  
336 tryptic soy broth (TSB) agar plates (VWR International, Leuven, Belgium) supplemented with  
337 1% mannitol (TSBM) at 25 °C (mannitol sustains the growth of *R. etli*). For inoculation, 48h-  
338 old plates were scraped with a sterile spartel and bacteria were suspended in PBS (Phosphate  
339 Buffered Saline) solution with pH 7.4 (Gibco, life technologies Europe, Bleiswijk,  
340 Netherlands). Bacterial biomass was measured using optical density at 600 nm (OD<sub>600</sub>).  
341 *Rhizobium etli* and *Xanthobacter autotrophicus* secreted copious amount of extracellular  
342 polymeric substances (slime) when grown on agar plate, and for that reason these two species  
343 were subjected to an additional washing step in PBS in order to remove slime prior to OD<sub>600</sub>  
344 measurement. *Streptomyces violaceoruber* grows as a mycelium, which can bias OD<sub>600</sub>  
345 measurement. Therefore, *S. violaceoruber* was further treated in an ultrasonic bath (Branson  
346 Ultrasonics, Danbury, Connecticut, United States) at 40 kHz for 30 seconds in PBS to  
347 homogenize the bacterial suspension prior to OD<sub>600</sub> measurement. All bacterial communities  
348 were prepared with the same final size of approx.  $5.5 \times 10^4$  cells (calculated from OD<sub>600</sub>  
349 measurement) with PBS used for dilutions. For the community containing all 11 members,  
350 individual species with an OD<sub>600</sub> of 0.1 were combined in equal proportions and further diluted  
351 with PBS to approx. 5 000 cells of each member resulting in a total community size of  $\sim 5.5 \times$   
352  $10^4$  cells. For the overrepresentation one member was added with 100x fold higher initial  
353 abundance ( $\sim 50\ 000$  cells) to the other ten species with  $\sim 500$  cells each (total community size

354  $5.5 \times 10^4$  cells). Inocula missing one species were prepared by combining 10 out of 11 members  
355 at approx.  $5 \times 10^4$  cells each, resulting in communities of ten members with a total community  
356 size of  $\sim 5.5 \times 10^4$  cells. As culture medium, 240  $\mu$ l of 0.1x TSBM were added to each  
357 microhabitat and microcosms were inoculated with 10  $\mu$ l of the bacterial community. The same  
358 procedure was applied to inoculate liquid cultures in 96-well system kept in parallel to the  
359 experimental set-up at constant temperature of 25 °C.

360

### 361 *Bacterial community growth in microcosms*

362 For details on microcosms preparation and incubation, see Supplementary Methods. Briefly,  
363 structured microcosms were set-up in multi-well plates with a 0.22  $\mu$ m filter membrane at the  
364 bottom of the well (Merck, Darmstadt, Germany) and containing 250 mg of sterile glass beads  
365 (with diameter of 80 to 120  $\mu$ m) per well. Microcosms were connected via a saturated porous  
366 plate to a sterile medium reservoir containing 800 ml of saline solution. The height of the liquid  
367 column (the difference in elevation between the microcosms surface and the liquid medium  
368 level in the reservoir) prescribed the liquid tension and thus the hydration conditions in the  
369 porous plate and the glass-beads microcosms. In parallel, conventional multiwell plates were  
370 used for homogeneous liquid microcosms. Each multiwell plate contained 80 parallel  
371 microcosms with 20 different initial inocula. An inoculum with the 11 species at equal  
372 proportions; 11 with one member 100x overrepresented and 8 with one member missing with  
373 four replicate wells per community inoculum. Two liquid habitat multiwell plates and four  
374 structured habitat multiwell plates (2 WET and 2 DRY, Fig. 1) were prepared. One plate of  
375 each treatment was sacrificed after 2 and 6 days of incubation at 25 °C for total DNA extraction  
376 from microcosms.

377

### 378 *DNA extraction and quantification*



379 The microcosms contents were transferred by pipetting to individual 1.2 ml tubes (Brand GmbH  
380 + co KG, Wertheim, Germany), immediately frozen in liquid nitrogen and stored at -80 °C. At  
381 the end of the experiment all samples were thawed on ice, and DNA was extracted using the  
382 DNeasy blood and tissue kit (Qiagen, Hilden, Germany) following the manufacturer's  
383 instructions for increased cell lysis efficiency. DNA concentration was quantified  
384 fluorometrically using the Qubit dsDNA HS assay kit (Thermo Fischer Scientific). See  
385 Supplementary Methods for details.

386

### 387 *Microfluidic quantitative real-time PCR*

388 Microfluidic quantitative PCR was performed using a Fluidigm 192x24 Dynamic Array  
389 (Fluidigm Corporation, San Francisco, CA, USA). Details on the qPCR method using assay  
390 chips with integrated fluidic circuits (IFCs) for high throughput is described in previous work  
391 (Kleyer et al 2017, Kleyer et al 2019), including a nested-PCR approach where the 16S rRNA  
392 gene is preamplified with universal primers to enhance the signal for real-time PCR  
393 quantification of individual community members via species-specific PCR primers  
394 (Supplementary Table S1). For more details, see Supplementary Methods.

395

### 396 *Data Analysis and Statistics*

397 Real-time quantitative PCR data were analysed with the software provided by the manufacturer  
398 (Fluidigm Corporation). We used standard curves obtained from a mixture of pure genomic  
399 DNA from each species to quantify the absolute abundance of individual species in the  
400 microcosms (Supplementary Fig. S1). This absolute abundance was estimated for a given  
401 species as the number of 'genome equivalents' per unit mass genomic DNA based on  
402 information on each species genome size (for more details see reference (Kleyer et al 2019)).  
403 Total species abundance in each microcosm was back-calculated from total community DNA  
404 extracted per microcosm (Qubit high-sensitivity assay for dsDNA; Thermo Fisher Scientific)

405 (Fig. 2A). Measurement values  $<1$  genome in DNA template were not reported. A Bray-Curtis  
406 dissimilarity matrix was calculated in R ([www.r-project.org](http://www.r-project.org)) with the R package `vegan`. To  
407 show most of the variation we performed a principle coordinate analysis PCoA (R-package  
408 `vegan`) and visualized the result with `ggplot2` (Fig. 2B). Analysis of similarity (ANOSIM) was  
409 performed with the R-package `vegan` to obtain statistical R-values for dissimilarity between  
410 time points and treatments (Fig. 2C). Interspecific interactions reflected in positive and negative  
411 effects of overrepresented- or omitted community members were calculated from absolute  
412 abundance data by comparing the abundance of each species per sample to the abundance of  
413 the same species in the control microcosms (inoculated with an even mix of all species).  
414 Variations (increase or decrease) in absolute abundances were deemed significant and thus  
415 represented when  $>5$ -fold with a p-value  $<0.05$  (using a two-tailed t-test on 4 replicates).  
416

417 **Acknowledgments**

418 We thank Aria Minder and Silvia Kobel from the Genetic Diversity Center of ETH Zurich for  
419 help with the Fluidigm high throughput qPCR. Financial support for this work came from the  
420 Swiss National Science Foundation (project number 31003A\_182734). We declare that the  
421 research was conducted in the absence of any commercial or financial relationships that could  
422 be construed as a potential conflict of interest.

423

424 **Author Contributions**

425 H.K., R.T. and D.O. designed the research. H.K. performed the experimental research and  
426 analyzed data. H.K., R.T. and D.O. wrote the manuscript.

427

## 428 **References**

- 429 Abreu CI, Friedman J, Andersen Woltz VL, Gore J (2019). Mortality causes universal changes  
430 in microbial community composition. *Nature Communications* **10**: 2120.  
431
- 432 Afshinnkoo E, Meydan C, Chowdhury S, Jaroudi D, Boyer C, Bernstein N *et al* (2015).  
433 Geospatial Resolution of Human and Bacterial Diversity with City-Scale Metagenomics. *Cell*  
434 *Systems* **1**: 72-87.  
435
- 436 Bahram M, Hildebrand F, Forslund SK, Anderson JL, Soudzilovskaia NA, Bodegom PM *et al*  
437 (2018). Structure and function of the global topsoil microbiome. *Nature* **560**: 233-237.  
438
- 439 Bai Y, Müller DB, Srinivas G, Garrido-Oter R, Potthoff E, Rott M *et al* (2015). Functional  
440 overlap of the Arabidopsis leaf and root microbiota. *Nature* **528**: 364.  
441
- 442 Ben Said S, Tecon R, Borer B, Or D (2020). The engineering of spatially linked microbial  
443 consortia – potential and perspectives. *Curr Opin Biotechnol* **62**: 137-145.  
444
- 445 Bickel S, Or D (2020). Soil bacterial diversity mediated by microscale aqueous-phase processes  
446 across biomes. *Nature Communications* **11**: 116.  
447
- 448 Borer B, Tecon R, Or D (2018). Spatial organization of bacterial populations in response to  
449 oxygen and carbon counter-gradients in pore networks. *Nature communications* **9**: 769.  
450
- 451 Borer B, Ataman M, Hatzimanikatis V, Or D (2019). Modeling metabolic networks of  
452 individual bacterial agents in heterogeneous and dynamic soil habitats (IndiMeSH). *PLoS Comp*  
453 *Biol* **15**: e1007127.  
454
- 455 Brennan, F. P., O'Flaherty, V., Kramers, G., Grant, J., & Richards, K. G. (2010). Long-term  
456 persistence and leaching of *Escherichia coli* in temperate maritime soils. *Applied and*  
457 *environmental microbiology*, 76(5), 1449-1455.  
458
- 459 Brenner, D. J., Krieg, N. R., Staley, J. T., & Garrity, G. (2005). *Bergey's manual of systematic*  
460 *bacteriology*, Vol 2: The Proteobacteria. NY: Springer.  
461
- 462 Bruno JF, Stachowicz JJ, Bertness MD (2003). Inclusion of facilitation into ecological theory.  
463 *Trends Ecol Evol* **18**: 119-125.  
464
- 465 Cairns J, Jokela R, Hultman J, Tamminen M, Virta M, Hiltunen T (2018). Construction and  
466 characterization of synthetic bacterial community for experimental ecology and evolution.  
467 *Frontiers in genetics* **9**: 312.  
468
- 469 Carlström CI, Field CM, Bortfeld-Miller M, Müller B, Sunagawa S, Vorholt JA (2019).  
470 Synthetic microbiota reveal priority effects and keystone strains in the Arabidopsis  
471 phyllosphere. *Nature Ecology & Evolution* **3**: 1445-1454.  
472
- 473 Chodkowski JL, Shade A (2017). A Synthetic Community System for Probing Microbial  
474 Interactions Driven by Exometabolites. *mSystems* **2**: e00129-00117.  
475

- 476 Costea PI, Hildebrand F, Arumugam M, Bäckhed F, Blaser MJ, Bushman FD *et al* (2018).  
477 Enterotypes in the landscape of gut microbial community composition. *Nature Microbiology*  
478 **3**: 8-16.  
479
- 480 Coyte KZ, Schluter J, Foster KR (2015). The ecology of the microbiome: Networks,  
481 competition, and stability. *Science* **350**: 663-666.  
482
- 483 D'Souza G, Shitut S, Preussger D, Yousif G, Waschina S, Kost C (2018). Ecology and evolution  
484 of metabolic cross-feeding interactions in bacteria. *Natural Product Reports* **35**: 455-488.  
485
- 486 Delgado-Baquerizo M, Oliverio AM, Brewer TE, Benavent-González A, Eldridge DJ, Bardgett  
487 RD *et al* (2018). A global atlas of the dominant bacteria found in soil. *Science* **359**: 320-325.  
488
- 489 Ebrahimi A, Or D (2015). Hydration and diffusion processes shape microbial community  
490 organization and function in model soil aggregates. *Water Resour Res*: n/a-n/a.  
491
- 492 Enke TN, Datta MS, Schwartzman J, Cermak N, Schmitz D, Barrere J *et al* (2019). Modular  
493 Assembly of Polysaccharide-Degrading Marine Microbial Communities. *Curr Biol* **29**: 1528-  
494 1535.e1526.  
495
- 496 Foster Kevin R, Bell T (2012). Competition, Not Cooperation, Dominates Interactions among  
497 Culturable Microbial Species. *Curr Biol* **22**: 1845-1850.  
498
- 499 Friedman J, Higgins LM, Gore J (2017). Community structure follows simple assembly rules  
500 in microbial microcosms. *Nature Ecology & Evolution* **1**: 0109.  
501
- 502 Fu, He, et al. "Ecological drivers of bacterial community assembly in synthetic phycospheres."  
503 *Proceedings of the National Academy of Sciences* 117.7 (2020): 3656-3662.  
504
- 505 Ghoul, Melanie, and Sara Mitri. "The ecology and evolution of microbial competition." *Trends*  
506 *in microbiology* 24.10 (2016): 833-845.  
507
- 508 Gokhale S, Conwill A, Ranjan T, Gore J (2018). Migration alters oscillatory dynamics and  
509 promotes survival in connected bacterial populations. *Nature Communications* **9**: 5273.  
510
- 511 Goldford JE, Lu N, Bajić D, Estrela S, Tikhonov M, Sanchez-Gorostiaga A *et al* (2018).  
512 Emergent simplicity in microbial community assembly. *Science* **361**: 469-474.  
513
- 514 Ibarbalz FM, Henry N, Brandão MC, Martini S, Busseni G, Byrne H *et al* (2019). Global Trends  
515 in Marine Plankton Diversity across Kingdoms of Life. *Cell* **179**: 1084-1097.e1021.  
516
- 517 Kehe J, Kulesa A, Ortiz A, Ackerman CM, Thakku SG, Sellers D *et al* (2019). Massively  
518 parallel screening of synthetic microbial communities. *Proceedings of the National Academy*  
519 *of Sciences* **116**: 12804-12809.  
520
- 521 Kim HJ, Boedicker JQ, Choi JW, Ismagilov RF (2008). Defined spatial structure stabilizes a  
522 synthetic multispecies bacterial community. *Proceedings of the National Academy of Sciences*  
523 **105**: 18188-18193.  
524
- 525 Kim M, Or D (2017). Hydration status and diurnal trophic interactions shape microbial  
526 community function in desert biocrusts. *Biogeosciences* **14**: 5403-5424.

- 527  
528 Kleyer H, Tecon R, Or D (2017). Resolving Species Level Changes in a Representative Soil  
529 Bacterial Community Using Microfluidic Quantitative PCR. *Frontiers in Microbiology* **8**.  
530  
531 Kleyer H, Tecon R, Or D (2019). Rapid shifts in bacterial community assembly under static  
532 and dynamic hydration conditions in porous media. *Appl Environ Microbiol*: AEM.02057-  
533 02019.  
534  
535 Lawson CE, Harcombe WR, Hatzenpichler R, Lindemann SR, Löffler FE, O'Malley MA *et al*  
536 (2019). Common principles and best practices for engineering microbiomes. *Nature Reviews*  
537 *Microbiology* **17**: 725-741.  
538  
539 Liang, Y., Meggo, R., Hu, D., Schnoor, J. L., & Mattes, T. E. (2014). Enhanced polychlorinated  
540 biphenyl removal in a switchgrass rhizosphere by bioaugmentation with *Burkholderia*  
541 *xenovorans* LB400. *Ecological engineering*, 71, 215-222.  
542  
543 Lindemann SR, Bernstein HC, Song H-S, Fredrickson JK, Fields MW, Shou W *et al* (2016).  
544 Engineering microbial consortia for controllable outputs. *ISME J*.  
545  
546 Little AEF, Robinson CJ, Peterson SB, Raffa KF, Handelsman J (2008). Rules of Engagement:  
547 Interspecies Interactions that Regulate Microbial Communities. *Annu Rev Microbiol* **62**: 375-  
548 401.  
549  
550 Lowery NV, Ursell T (2019). Structured environments fundamentally alter dynamics and  
551 stability of ecological communities. *Proceedings of the National Academy of Sciences* **116**:  
552 379-388.  
553  
554 Meroz, N., Tovi, N., Sorokin, Y. *et al*. Community composition of microbial microcosms  
555 follows simple assembly rules at evolutionary timescales. *Nat Commun* 12, 2891 (2021).  
556 <https://doi.org/10.1038/s41467-021-23247-0>  
557  
558 Nadell CD, Drescher K, Foster KR (2016). Spatial structure, cooperation and competition in  
559 biofilms. *Nat Rev Micro* **14**: 589-600.  
560  
561 Piccardi P, Vessman B, Mitri S (2019). Toxicity drives facilitation between 4 bacterial species.  
562 *Proceedings of the National Academy of Sciences* **116**: 15979-15984.  
563  
564 Ramette A, Frapolli M, Saux MF-L, Gruffaz C, Meyer J-M, Défago G *et al* (2011).  
565 *Pseudomonas protegens* sp. nov., widespread plant-protecting bacteria producing the biocontrol  
566 compounds 2,4-diacetylphloroglucinol and pyoluteorin. *Syst Appl Microbiol* **34**: 180-188.  
567  
568 Raynaud X, Nunan N (2014). Spatial Ecology of Bacteria at the Microscale in Soil. *PLoS ONE*  
569 **9**: e87217.  
570  
571 Rivett DW, Scheuerl T, Culbert CT, Mombrikotb SB, Johnstone E, Barraclough TG *et al*  
572 (2016). Resource-dependent attenuation of species interactions during bacterial succession. *The*  
573 *ISME Journal* **10**: 2259-2268.  
574  
575 Röttgers L, Faust K (2018). From hairballs to hypotheses—biological insights from microbial  
576 networks. *FEMS Microbiol Rev* **42**: 761-780.  
577

- 578 Saleem M, Pervaiz ZH, Traw MB (2015). Theories, Mechanisms and Patterns of Microbiome  
579 Species Coexistence in an Era of Climate Change. *Microbiome Community Ecology:  
580 Fundamentals and Applications*. Springer International Publishing: Cham. pp 13-53.  
581
- 582 Singh, P., & Tiwary, B. N. (2017). Optimization of conditions for polycyclic aromatic  
583 hydrocarbons (PAHs) degradation by *Pseudomonas stutzeri* P2 isolated from Chirimiri coal  
584 mines. *Biocatalysis and agricultural biotechnology*, 10, 20-29.  
585
- 586 Tecon R, Or D (2017). Biophysical processes supporting the diversity of microbial life in soil.  
587 *FEMS Microbiol Rev* **41**: 599-623.  
588
- 589 Tecon R, Ebrahimi A, Kleyer H, Levi SE, Or D (2018). Cell-to-cell bacterial interactions  
590 promoted by drier conditions on soil surfaces. *Proceedings of the National Academy of Sciences*  
591 **115**: 9791-9796.  
592
- 593 Tilman D (1982). *Resource competition and community structure*. Princeton university press.  
594
- 595 Tilman D (1994). Competition and biodiversity in spatially structured habitats. *Ecology* **75**: 2-  
596 16.  
597
- 598 Vacheron J, Péchy-Tarr M, Brochet S, Heiman CM, Stojiljkovic M, Maurhofer M *et al* (2019).  
599 T6SS contributes to gut microbiome invasion and killing of an herbivorous pest insect by plant-  
600 beneficial *Pseudomonas protegens*. *The ISME Journal* **13**: 1318-1329.  
601
- 602 Voges MJ, Bai Y, Schulze-Lefert P, Sattely ES (2019). Plant-derived coumarins shape the  
603 composition of an *Arabidopsis* synthetic root microbiome. *Proceedings of the National  
604 Academy of Sciences* **116**: 12558-12565.  
605
- 606 Vorholt JA, Vogel C, Carlström CI, Müller DB (2017). Establishing causality: opportunities of  
607 synthetic communities for plant microbiome research. *Cell host & microbe* **22**: 142-155.  
608
- 609 Vos M, Wolf AB, Jennings SJ, Kowalchuk GA (2013). Micro-scale determinants of bacterial  
610 diversity in soil. *FEMS Microbiol Rev*: n/a-n/a.  
611
- 612 Wang G, Or D (2013). Hydration dynamics promote bacterial coexistence on rough surfaces.  
613 *ISME J* **7**: 395-404.  
614
- 615 Westerberg, K., Elväng, A. M., Stackebrandt, E., & Jansson, J. K. (2000). *Arthrobacter*  
616 *chlorophenolicus* sp. nov., a new species capable of degrading high concentrations of 4-  
617 chlorophenol. *International Journal of Systematic and Evolutionary Microbiology*, 50(6),  
618 2083-2092.  
619
- 620 Widder S, Allen RJ, Pfeiffer T, Curtis TP, Wiuf C, Sloan WT *et al* (2016). Challenges in  
621 microbial ecology: building predictive understanding of community function and dynamics.  
622 *The ISME journal*.  
623
- 624 Zegeye EK, Brislawn CJ, Farris Y, Fansler SJ, Hofmockel KS, Jansson JK *et al* (2019).  
625 Selection, Succession, and Stabilization of Soil Microbial Consortia. *MSystems* **4**: e00055-  
626 00019.  
627

## 628 Figures

629

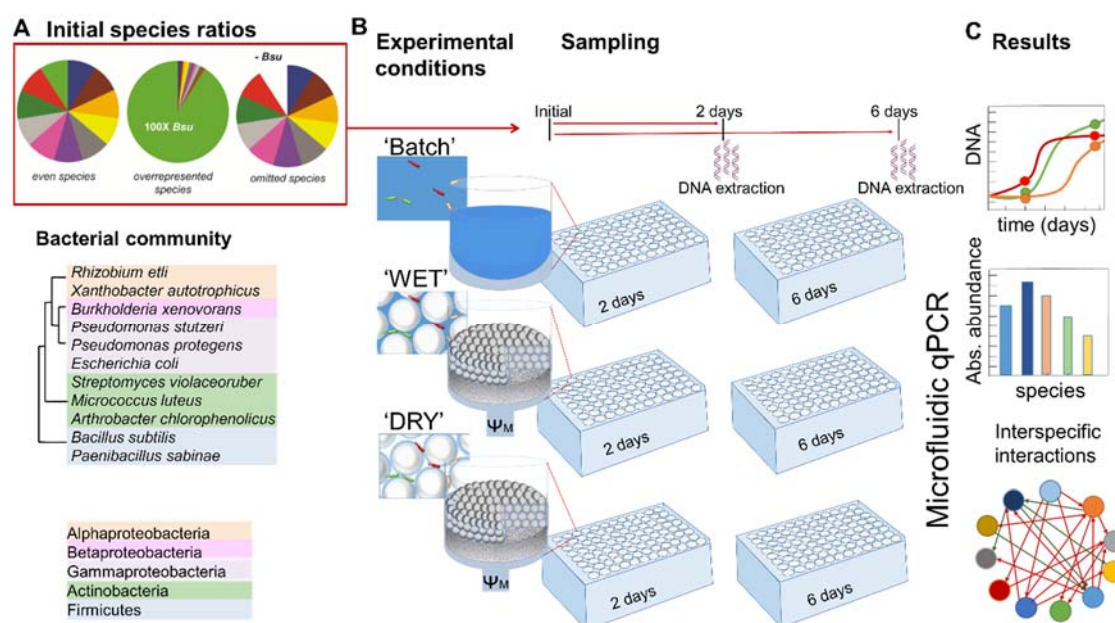

630

631

632 **Figure 1. Synthetic ecology as experimental approach.** (A) Synthetic bacterial community

633 of 11 phylogenetically diverse species. We manipulated the initial species ratio in the

634 community as follows. Species were mixed in even proportions, in uneven proportions with one

635 species being a 100-fold overrepresented, and in even proportions but with one species

636 removed. An example with *B. subtilis* is shown. (B) Microcosms were set up in multi-well

637 plates containing only liquid medium ('batch'), or liquid medium and glass beads (diameter

638  $\approx 100 \mu\text{m}$ ) to provide a spatial structure to the habitat, with prescribed hydration status in the

639 microcosms permitting us to maintain relatively 'wet' or 'dry' conditions in the structured

640 habitats. Even and uneven species mixes were used as inocula. Two multi-well plates per

641 treatment were prepared, and sacrificed after 2 and 6 days of incubation. Beads and bacteria are

642 shown for illustration purposes and their relative size is not on scale. (C) Microfluidic-based

643 qPCR was used to resolve bacterial community composition at the species level to obtain

644 relative and absolute abundance data.



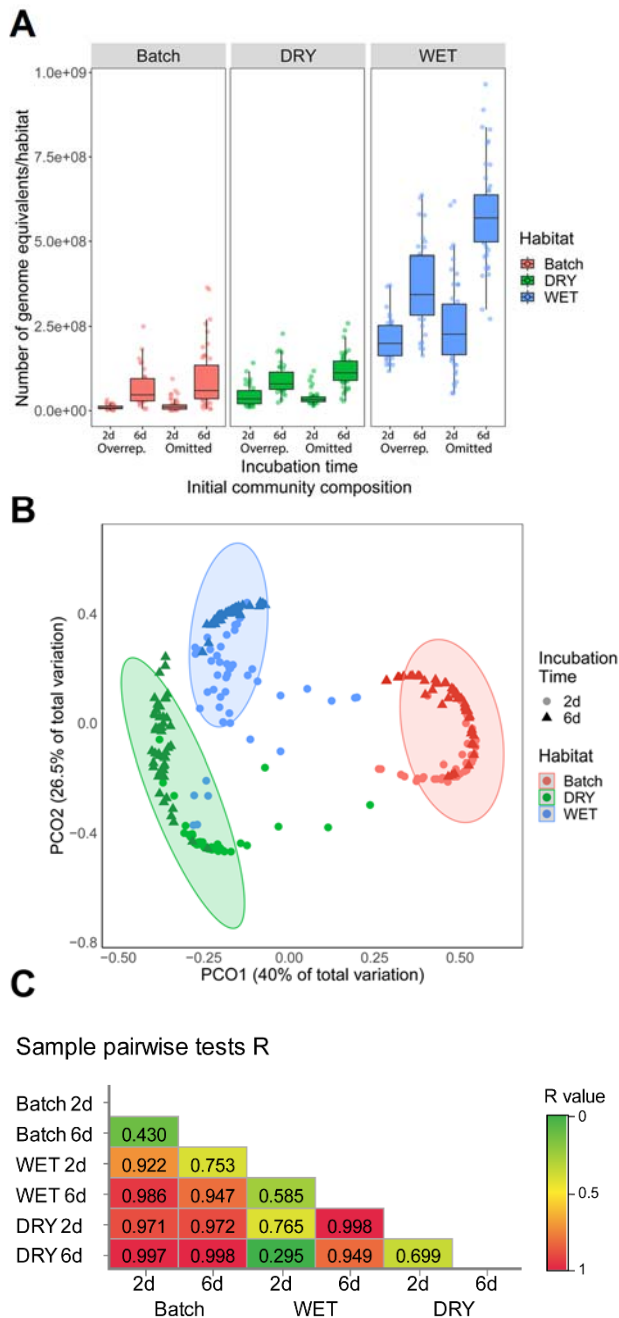

645

646

647 **Figure 2.** (A) Total bacterial community size as function of treatment and time. Boxplots show  
 648 the estimated sum of all species in the community, expressed as number of genome equivalents  
 649 per microcosm. Total abundances were systematically higher in wet structured microcosms  
 650 compared to dry structured and batch microcosms, and after 6 days compared to 2 days.  
 651 Omitting or 100x overrepresentation (Overrep.) of a species did not appear to affect the total  
 652 counts. (B) PCoA plot based on Bray-Curtis dissimilarity calculated for microcosms inoculated  
 653 with an even mix of species or mixes of species containing an overrepresented member.

654 Clustering indicates the largest separation between communities incubated in unstructured  
655 batch microcosms and in glass-bead structured microcosms under WET and DRY conditions,  
656 ellipses enclose 95% of the data points for each condition. Further separation is observed for  
657 the time of sampling (2 days and 6 days) forming partially overlapping sub-clusters. (C)  
658 Pairwise comparisons of dissimilarity between treatments were calculated with ANOSIM. R  
659 values close to 1.0 (red) suggest high dissimilarity between treatment groups. Communities in  
660 batch habitats strongly differ from communities growing in structured microcosms under DRY  
661 and WET conditions. Moreover, differences in community structure were observed between  
662 communities from structured microcosms kept under DRY and WET conditions. Community  
663 structure within the same treatment at the early and late time point show intermediate R values  
664 indicating some overlap.  
665

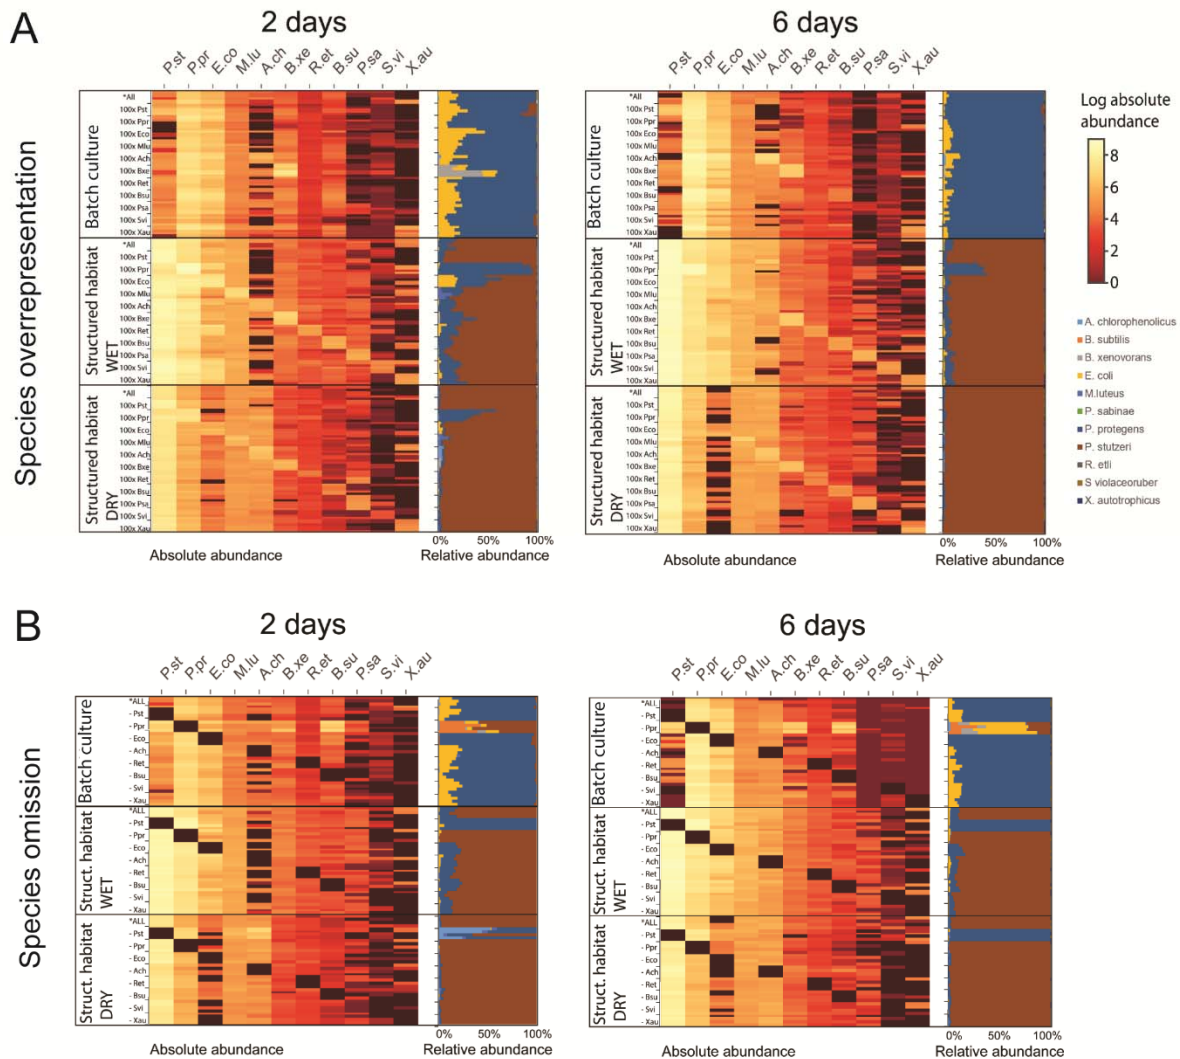

666

667

668 **Figure 3. Variations in bacterial community composition in microcosms.** The synthetic

669 bacterial community was grown in multi-well plates containing only liquid medium (liquid

670 habitat) or liquid medium mixed with glass beads (spatially structured habitats), the latter with

671 prescribed hydration providing constant wet or relatively dry conditions. Microcosms were

672 sacrificed after 2 or 6 days of incubation for total DNA extraction. Heatmaps show the absolute

673 abundances (log-transformed) of each species (columns) based on the absolute number of

674 genome equivalents measured in each microcosm by qPCR. Absolute counts were used to

675 calculate relative abundance values, shown alongside heatmaps. (A) We investigated the effects

676 of initial species ratios by manipulating the initial composition ratios of the inoculum (100-fold

677 increase of one species at a time compared to the others, 100X...), while a community with  
678 even proportions of all species served as a control (\*All). The different overrepresented inocula  
679 are shown as rows, each with four replicate microcosms per mix. (B) We selected 8 species to  
680 be removed from the initial inoculum, thus allowing us to test for causal effects on the growth  
681 of the remaining species. The communities are shown as rows, with four replicate microcosms  
682 per mix.

683

## A Species overrepresentation

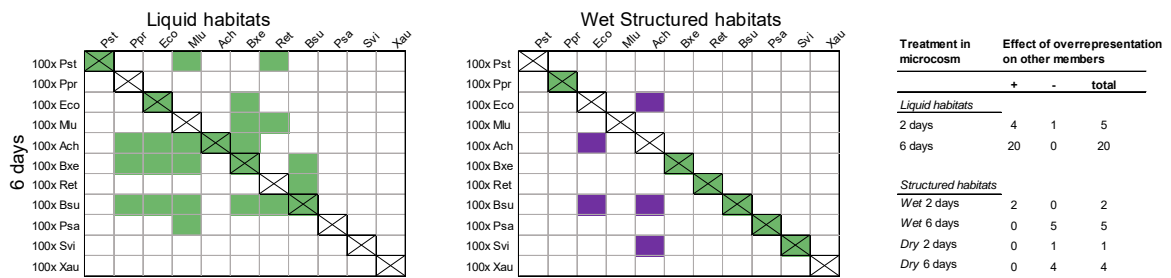

## B Species omission

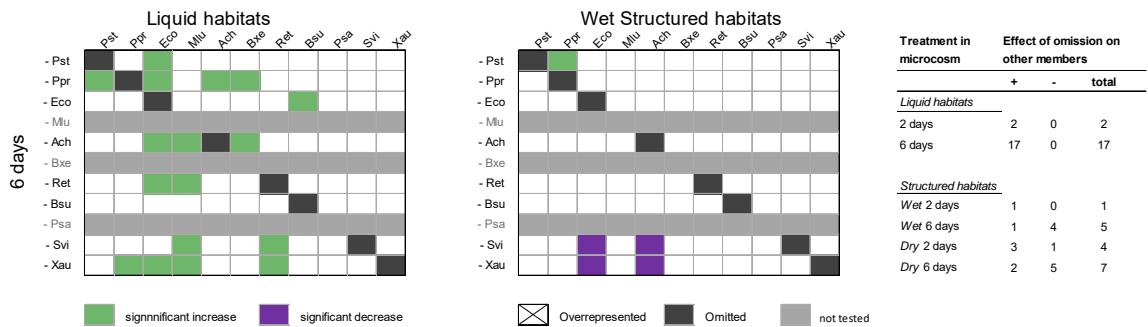

684

685 **Figure 4. Positive and negative effects of species overrepresentation and omission on other**

686 **species.** Microcosms were inoculated with initial community mixes containing a 100-fold

687 overrepresented species (A) or one omitted species (B). For simplicity we present results from

688 liquid and wet structured habitats after 6 days (full results are shown in Supplementary Fig. S2).

689 Green and magenta colors indicate that the absolute abundance of a given species was

690 respectively significantly higher or lower as a response to overrepresentation or omission of

691 another species in the mix compared to its abundance in control microcosms (inoculated with

692 an even mix of all species, either in liquid or in porous habitats). Variations (increase or

693 decrease) in absolute abundances were deemed significant when >5-fold with a p-value <0.05

694 (using a two-tailed t-test on 4 replicate microcosms). Tables show the detected effects for all

695 treatments and time points, excluding the effects of a species on itself. A significant increase

696 (+) or decrease (-) of one species as a response to overrepresentation or omission of another is

697 interpreted here as an interaction between the two species, which could be competitive or

698 facilitative depending on the context.

699

700

## Supplementary Information

701

## 702 **Supplementary Methods**

703

### 704 **Preparation and incubation of microcosms**

705 Structured microcosms were set-up in 96-well plates with a flat 0.22  $\mu\text{m}$  filter membrane at the  
706 bottom (Merck, Darmstadt, Germany) containing 250 mg of sterile glass beads (with diameter  
707 of 80 to 120  $\mu\text{m}$ ) per well. Individual 96-well plates were placed on a layer of quartz flour atop  
708 a ceramic plate (1 bar, 12 cm diameter, 0.5 cm thick). The quartz flour ensured a tight  
709 connection of the plate's wells with the ceramic -plate. Both the layer of quartz flour and the  
710 ceramic plate had been pre-saturated with saline solution (0.9% NaCl) and connected to a  
711 medium reservoir containing 800 ml saline solution in a bottle. All parts had been sterilized by  
712 autoclaving at 120  $^{\circ}\text{C}$  (saline-solution, medium, glass beads) or alternatively treated at 100  $^{\circ}\text{C}$   
713 for 20 minutes (ceramic disc with heat sensitive glue). The saturated quartz flour and ceramic  
714 plate permitted us to maintain a continuous liquid connection between the microcosms and the  
715 medium reservoir, and the height of the liquid column served to prescribe hydration conditions  
716 in the microcosms. Lowering the reservoir bottle induces drainage of liquid from the microbead  
717 habitat by a suction that increases with increasing vertical distance between the bead surface  
718 and the liquid level of the medium reservoir. This method allows us to induce unsaturated  
719 conditions where the energy level of the water is reduces near particle surface where capillary  
720 and adsorptive forces dominate. The matric potential ( $\Psi_m$ ) describes adhesive intermolecular  
721 forces between the water and the solid as negative pressure expressed in  $-\text{kPa}$  with the equation  
722  $\Psi_m = -\rho g h$ , where  $\rho$  is the density of water,  $g$  is the acceleration of gravity, and  $h$  is the height of  
723 the liquid column (1). Microcosms in this experiment were kept at a fixed hydration level  
724 mimicking WET and DRY conditions with a matric potential of  $-0.5 \text{ kPa}$  and  $-6 \text{ kPa}$  that is  $\sim 5$   
725 cm and  $\sim 60$  cm head difference between the microcosm surface and the medium level in the  
726 reservoir. Matric potential was allowed to establish and equilibrate for 5 h prior to inoculation.

727 Two liquid habitat set ups (2 day and 6 day sampling point) and four microbead setups (2 days  
728 WET + DRY and 6 days WET + DRY) and were prepared. All multiwall plates harbour 80  
729 parallel microcosms for 20 different microbial communities (one at equal proportions, 11 with  
730 one member 100x overrepresented and 8 communities missing one members) and four  
731 biological replicates per community. Structured habitats containing 250 mg glass-beads were  
732 placed on top of the hydration controlled ceramic. Fast wet up of the glass-beads indicate  
733 connectivity of the system. As culture medium 240  $\mu$ l 0.1x TSBM were added to each  
734 microhabitat and bacterial communities were inoculated as described above.

735

### 736 **DNA extraction and quantification**

737 For nucleic acid purification the bacterial communities were recovered from the microcosms  
738 including the liquid medium or the microbead-matrix and suspended in 180  $\mu$ l lysis buffer for  
739 nucleic acids purification (ATL buffer), to ensure recovery of filamentous growing species a  
740 cut tip with enlarged aperture was used. After transfer to 96-rack with 1.2 ml tubes (Brand  
741 GmbH + co KG, Wertheim, Germany) the samples were immediately frozen in liquid nitrogen  
742 and stored at -80 °C. After the experiment was completed samples were thawed on ice and DNA  
743 was extracted using the procedure described in the DNeasy blood and tissue handbook (Qiagen,  
744 Hilden, Germany) and the customized additional protocol for increased cell-lysis efficiency  
745 through a bead-beating step initiating the extraction procedure provided by the manufacturer.  
746 For cell lysis 250 mg glass beads were added to the liquid culture samples (WET and DRY  
747 samples already contained the glass bead-matrix) and samples were homogenized in a  
748 TissueLyser for 30 s at 6.5 m s<sup>-1</sup>. DNA was eluted with 50  $\mu$ l elutions buffer AE to increase  
749 DNA yield a second elution step was performed using the 50  $\mu$ l eluate from the first elution.  
750 DNA concentration was quantified fluorometrically using the Qubit dsDNA HS assay kit  
751 (Thermo Fischer Scientific) designed specifically to detect double-stranded DNA with high



752 sensitivity in a 384 well plate assay. For readout, we used the Spark 10M Multimode Microplate  
753 Reader (Tecan, Männedorf, Switzerland) (Fig. S1).

754

### 755 **Microfluidic quantitative real-time PCR**

756 DNA concentration was normalized to approx. 4 ng/ $\mu$ l with a pipetting robot in a liquid  
757 handling station (Brand GmbH + co KG). For the pre-amplification PCR, with 9.6  $\mu$ l of the  
758 community DNA in a total reaction volume of 20  $\mu$ l containing 200 nM of forward and reverse  
759 primers (Supplementary Table S1) in 1x GoTaq G2 Colorless Master Mix (Promega,  
760 Duebendorf, Switzerland). Preamplification was performed on a PCR thermal cycler  
761 (Sensoquest, Goettingen, Germany) with the following program: initial denaturation at 95°C  
762 for 10 min, followed by 15 cycles of denaturation at 95°C for 30 s, annealing at 59°C for 30 s,  
763 elongation at 72°C for 90 s, followed by a final elongation step at 72°C for 10 min. Primers  
764 were removed prior to real-time quantitative PCR by treating 5  $\mu$ l of the reaction with 10 U  
765 Exonuclease I (Thermo Fisher Scientific) at 37 °C for 15 min followed by a heat inactivation  
766 step of the enzyme at 85 °C for 15 min. The remaining PCR reaction was amplified for another  
767 15 cycles, and the product was further visualized on an agarose gel to control for the presence  
768 of a single amplicon with size of  $\sim$ 1.5 kb.

769 The exonuclease-treated PCR products were diluted 5 times in DNA suspension buffer (10 mM  
770 Tris, pH 8.0, 0.1 mM EDTA) and 2  $\mu$ l diluted PCR product were added to 3  $\mu$ l sample mix  
771 containing 1x qPCR Mix (HOT FIREPol EvaGreen qPCR Mix Plus (ROX), Solis Biodyne,  
772 Tartu, Estonia) and 1x DNA Binding Dye (Fluidigm Corporation), with a final volume of 5  $\mu$ l.  
773 For the assay mix 1x Assay Loading Reagent (Fluidigm, PN 85000736) was combined with  
774 100  $\mu$ M of forward and reverse primer and nuclease free water was added to a final volume of  
775 4  $\mu$ l (3  $\mu$ l per inlet plus 1  $\mu$ l overage). Supplementary Table S1 contains species-specific primer

776 pairs used in the assay. All primers were previously designed and tested for the characterization  
777 of our representative soil bacterial community.

778 After mixing 3  $\mu$ l of the assay and of the sample mix were added to the respective inlet of the  
779 192.24 Dynamic Array (Fluidigm) and the chip was loaded and run on the Biomark system  
780 using the same real-time quantitative PCR protocol as described previously (2) In total samples  
781 from 480 bacterial communities (4 biological replicates) plus 20 community DNA samples used  
782 for inoculation were assayed on 3 IFC-chips each designed for 192 samples to be automatically  
783 combined with a duplicate set of 12 primer-pairs (Gene Expression 192.24 IFC, Fluidigm corp.)  
784 together with two negative controls and an eight point standard calibration in duplicate per chip.  
785

786 **Supplementary Figures**

787

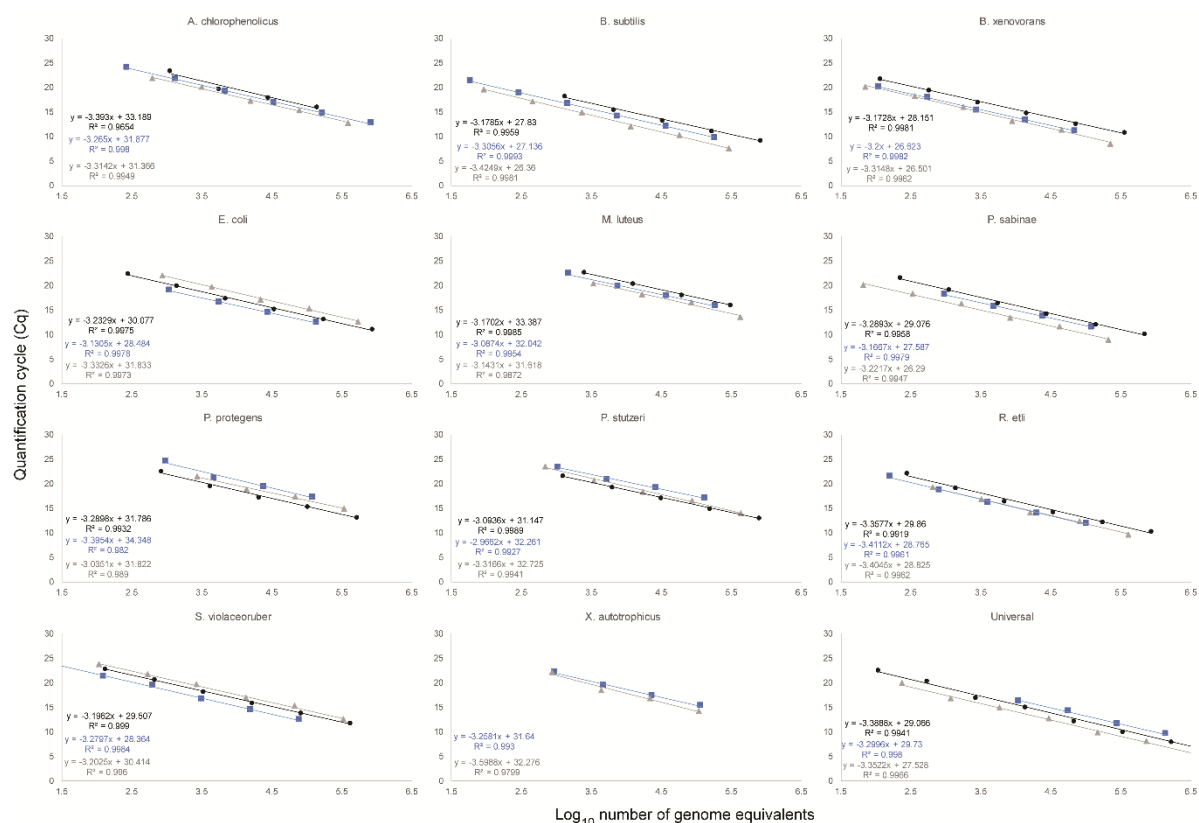

788

789

790 **Figure S1. Standard Calibration Curves.** Standard calibration curves to calculate abundance

791 of each member of the bacterial community from qPCR data. Purified genomic DNA with

792 known concentration from eleven individual species (Bacterial strains detailed in the Material

793 and Methods section) were combined in equal proportions to prepare fivefold serial dilutions

794 and run in parallel reaction on a Biomark GeneExpression 48.48 IFC (Fluidigm) with each

795 individual species-specific primer pair or with a universal primer pair (Table S1). Based on

796 genome size and known concentration of genomic DNA per species in the stock solution the

797 number of genome equivalent copies was calculated and plotted against the cycle threshold for

798 each species-specific qPCR assay. Data evaluation was performed with the Fluidigm software

799 from four technical replicates per dilution. Standard calibration was calculated for three

800 independent qPCR chips, displayed in black, blue and grey. Equations of fitted linear regression

801 lines and R2 values are shown, calculated from average Cq values. For data evaluation the  
802 average values from all three calibrations were used.

803

804

## A Overrepresentation

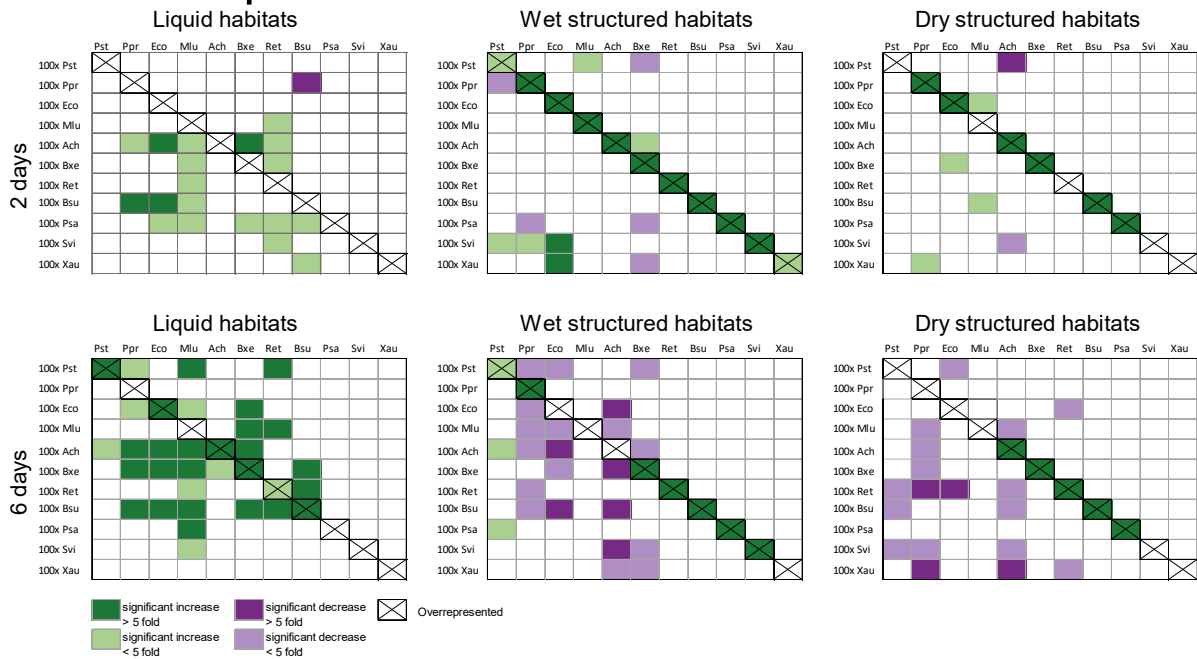

805

806

## B Omission

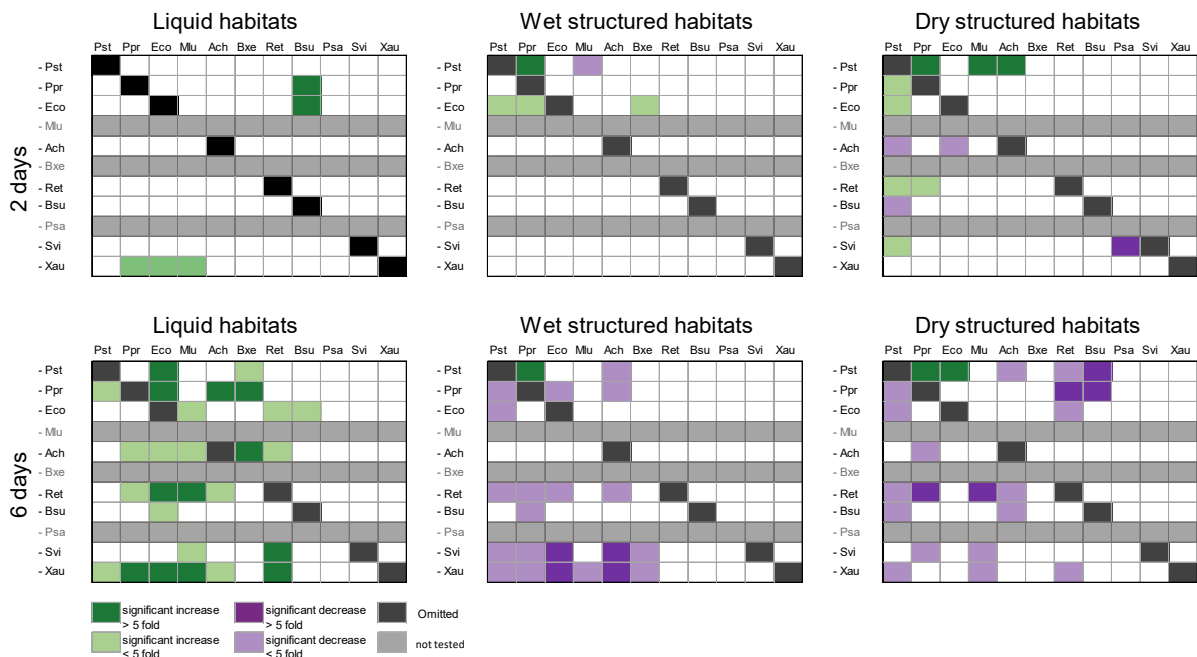

807

808

809

**Figure S2. Positive and negative interactions between individual species. (A) Microcosms**

810 were inoculated with initial community mixes containing one overrepresented species. (B)

811 Microcosms were inoculated with community mixes where one species has been omitted. This

812 was done for all species except *B. xenovorans*, *M. luteus* and *P. sabinae*. Green and magenta

813 colors indicate that the absolute abundance of a given species was respectively significantly

814 higher or lower compared to the control microcosms (inoculated with an even mix of all  
815 species). Variations (increase or decrease) in absolute abundances were deemed significant with  
816 a p-value <0.05 (using a two-tailed t-test on 4 replicates) for light colours and significant with  
817 an in- decrease of >5-fold dark colours.  
818

819 **Supplementary Tables**

820 **Table S1. Primers used in real-time PCR.**

| Name                          | Sequence (5' to 3')   | Tm [°C] | CG Content [%] | Length [nt] | Target pos. 16S | Reference         |
|-------------------------------|-----------------------|---------|----------------|-------------|-----------------|-------------------|
| Species-specific primer pairs |                       |         |                |             |                 |                   |
| A_chlo F                      | CAGCTTGCTGGTGGATTA    | 60.5    | 50.0           | 18          | 118-283         | (2)               |
| A_chlo R                      | CACCATGCGATGATCAGT    | 61.3    | 50.0           | 18          |                 | (2)               |
| B_subt F                      | GACAGATGGGAGCTTGCT    | 61.1    | 55.6           | 18          | 82-165          | (2)               |
| B_subt R                      | TGTAAGTGGTAGCCGAAGC   | 61.0    | 52.6           | 19          |                 | (2)               |
| B_xeno F                      | AATACATCGGAACGTGTCCT  | 61.3    | 45.0           | 20          | 128-209         | (2)               |
| B_xeno R                      | TCCTCTCAGACCAGCTACAG  | 60.3    | 55.0           | 20          |                 | (2)               |
| E_coli F                      | GAAGCTTGCTTCTTTGCTG   | 61.0    | 47.4           | 19          | 73-177          | (2)               |
| E_coli R                      | TTGGTCTTGCACGTTATG    | 62.8    | 47.4           | 19          |                 | (2)               |
| M_lute F                      | GACATGTTCCCGATCGCC    | 67.1    | 61.1           | 18          | 79-183          | (2)               |
| M_lute R                      | CCACCATTACGTGCTGGC    | 65.7    | 61.1           | 18          |                 | (2)               |
| P_prot F                      | GTACTIONTACCTGGTGGCG  | 61.2    | 57.9           | 19          | 153-270         | (2)               |
| P_prot R                      | GTATTAGCGCCCGTTTCC    | 62.4    | 55.6           | 18          |                 | (2)               |
| P_sabi F                      | GAGTTATGATGGAGCTTGCT  | 59.0    | 45.0           | 20          | 68-201          | (2)               |
| P_sabi R                      | GGTATGCACCAGAAGGTCTT  | 61.1    | 50.0           | 20          |                 | (2)               |
| P_stut F                      | CTTGCTCCATGATTCAGC    | 60.1    | 50.0           | 18          | 79-157          | (2)               |
| P_stut R                      | ACGTATGCGGTATTAGCGT   | 60.2    | 47.4           | 19          |                 | (2)               |
| R_etli F                      | GTATACTGTTCGGTGGCG    | 59.1    | 55.5           | 18          | 781-971         | (3)               |
| R_etli R                      | GAAGGGAACCCTGCATC     | 60.7    | 58.8           | 17          |                 | (3)               |
| S_viol F                      | GAACGATGAACCACTTCGGTG | 65.3    | 50.0           | 20          | 64-179          | (2)               |
| S_viol R                      | GATGCCTGCGAGGGTCAGTA  | 66.2    | 57.9           | 19          |                 | (2)               |
| X_auto F                      | GATCTACCAATGGTACGG    | 59.5    | 52.6           | 19          | 68-180          | (2)               |
| X_auto R                      | GTTCATCCAATGGCGATA    | 60.0    | 44.4           | 18          |                 | (2)               |
| Universal primer pairs        |                       |         |                |             |                 |                   |
| 27F                           | AGAGTTTGATCCTGGCTCAG  | 61.5    | 50             | 20          |                 | (4)               |
| 1492R                         | CGGTTACCTGTTACGACTT   | 58.7    | 45             | 20          |                 | (4)               |
| 1099F mod                     | AACGAGCGCAACCCT       | 61.2    | 60             | 15          |                 | modified from (4) |
| 1407R mod                     | GACGGGCGGTGTGTA       | 60.9    | 66.7           | 15          |                 | modified from (5) |

821

822

823 **Table S2.** Species used in study are well characterized at the genomic and phenotypic level and  
 824 span a wide diversity of bacterial phyla. Selected species differ in physiology, but all grow  
 825 aerobically and can be cultivated under standard laboratory conditions.

| Species                                    | Phylogeny/Class     | Description                                                                                                                                                                                                                                                                             |
|--------------------------------------------|---------------------|-----------------------------------------------------------------------------------------------------------------------------------------------------------------------------------------------------------------------------------------------------------------------------------------|
| <i>Arthrobacter chlorophenolicus</i> (Ach) | Actinobacteria      | Soil, rods/cocci, motile, non-spore-forming, involved in bioremediation of phenols such as 4-chlorophenol (4-CP), 4-nitrophenol (4-NP) and phenol [6]                                                                                                                                   |
| <i>Bacillus subtilis</i> (Bsu)             | Firmicutes,         | Soil, rods, motile, spore-forming, of industrial relevance due to production of hyaluronic acids, specifically proteases [7, 8]                                                                                                                                                         |
| <i>Burkholderia xenovorans</i> (Bxe)       | Betaproteobacteria, | Rhizosphere, rods, motile, non-spore-forming, play important role in bioremediation due to ability to degrade polychlorinated biphenyl (PCB) [9]                                                                                                                                        |
| <i>Escherichia coli</i> (Eco)              | Gammaproteobacteria | Usually found in intestine of warm-blooded organisms, but often detected as faecal contaminant in environmental samples [10, 11], rods, motile, non-spore-forming                                                                                                                       |
| <i>Micrococcus luteus</i> (Mlu)            | Actinobacteria      | Soil cocci, non-motile, non-spore-forming, involve in bioremediation: ability to degrade toxic organic pollutants and tolerance to metals [12]                                                                                                                                          |
| <i>Paenibacillus sabiniae</i> (Psa)        | Firmicutes          | Rhizosphere, rods, motile, spore-forming, have ability to fix nitrogen [13]                                                                                                                                                                                                             |
| <i>Pseudomonas protegens</i> (Ppr)         | Gammaproteobacteria | Rhizosphere, rods, motile, non-spore-forming, have biocontrol properties: plant-protecting bacteria, produces the antimicrobial compounds pyoluteorin and 2,4-diacetylphloroglucinol (DAPG) which are active against various plant pathogens [14]                                       |
| <i>Pseudomonas stutzeri</i> (Pst)          | Gammaproteobacteria | Rhizosphere, rods, motile, non-spore-forming Nitrogen fixation, denitrification, bioremediation due to ability to degrade polycyclic aromatic hydrocarbons (PAHs) [15]                                                                                                                  |
| <i>Rhizobium etli</i> (Ret)                | Alphaproteobacteria | Rhizosphere, rods, motile, non-spore-forming, form symbiotic relationship with legumes performing nitrogen fixation [16]                                                                                                                                                                |
| <i>Streptomyces violaceoruber</i> (Svi)    | Actinobacteria      | Soil, filaments, non-motile, spore-forming, model organism for gram-positive soil bacteria of high G+C content that undergoes a complex life cycle of mycelial growth and spore formation and produces a variety of antibiotics and other drugs during the differentiation process [17] |
| <i>Xanthobacter autotrophicus</i> (Xau)    | Alphaproteobacteria | soil, rods, non-motile, non-spore-forming Nitrogen fixation, involved in bioremediation via degradation of 1,2-dichloroethane, methanol and propane [18]                                                                                                                                |

826

827



## 828 **Supplementary References**

- 829 1. D. Hillel, Introduction to environmental soil physics (Academic press, 2003).
- 830 2. H. Kleyer, R. Tecon, D. Or, Resolving Species Level Changes in a Representative Soil  
831 Bacterial Community Using Microfluidic Quantitative PCR. *Frontiers in Microbiology* 8  
832 (2017).
- 833 3. H. Kleyer, R. Tecon, D. Or, Rapid Shifts in Bacterial Community Assembly under Static  
834 d Dynamic Hydration Conditions in Porous Media. *Appl Environ Microbiol* 86 (2019).
- 835 4. D. Lane, 16S/23S rRNA sequencing. *Nucleic acid techniques in bacterial systematics.*,  
836 115-175 (1991).
- 837 5. S. E. Dyksterhouse et al., *Cycloclasticus pugetii* gen. nov., sp. nov., an aromatic  
838 hydrocarbon-degrading bacterium from marine sediments. 45, 116-123 (1995).
- 839 6. Zheng Liu, Chao Yang, Chuanling Qiao, Biodegradation of p-nitrophenol and 4-  
840 chlorophenol by *Stenotrophomonas* sp., *FEMS Microbiology Letters*, Volume 277, Issue  
841 2, December 2007, Pages 150–156, <https://doi.org/10.1111/j.1574-6968.2007.00940.x>
- 842 7. Widner B, Behr R, Von Dollen S, et al. Hyaluronic acid production in *Bacillus subtilis*.  
843 *Appl Environ Microbiol.* 2005;71(7):3747-3752. doi:10.1128/AEM.71.7.3747-3752.2005
- 844 8. Sze, J.H., Brownlie, J.C. & Love, C.A. Biotechnological production of hyaluronic acid: a  
845 mini review. *3 Biotech* 6, 67 (2016). <https://doi.org/10.1007/s13205-016-0379-9>
- 846 9. Tehrani R, Lyv MM, Kaveh R, Schnoor JL, Van Aken B. Biodegradation of mono-  
847 hydroxylated PCBs by *Burkholderia xenovorans*. *Biotechnol Lett.* 2012;34(12):2247-  
848 2252. doi:10.1007/s10529-012-1037-x
- 849 10. Boehm AB, Wang D, Ercumen A, Shea M, Harris AR, Shanks OC, et al. (2016)  
850 Occurrence of Host-Associated Fecal Markers on Child Hands, Household Soil, and  
851 Drinking Water in Rural Bangladeshi Households. *Environ. Sci. Technol. Lett* 3: 393–  
852 398.
- 853 11. Navab-Daneshmand T, Friedrich MND, Gächter M, et al. *Escherichia coli* Contamination  
854 across Multiple Environmental Compartments (Soil, Hands, Drinking Water, and  
855 Handwashing Water) in Urban Harare: Correlations and Risk Factors. *Am J Trop Med*  
856 *Hyg.* 2018;98(3):803-813. doi:10.4269/ajtmh.17-0521
- 857 12. Sandrin TR, Maier RM. Impact of metals on the biodegradation of organic pollutants.  
858 *Environ Health Perspect.* 2003;111(8):1093-1101. doi:10.1289/ehp.5840

- 859 13. Ma Y, Xia Z, Liu X, Chen S. *Paenibacillus sabiniae* sp. nov., a nitrogen-fixing species  
860 isolated from the rhizosphere soils of shrubs. *Int J Syst Evol Microbiol.* 2007;57(Pt 1):6-  
861 11. doi:10.1099/ijs.0.64519-0
- 862 14. J Almario, M Bruto, J Vacheron, C Prigent-Combaret, Y Moënne-Loccoz, D. Müller.  
863 Distribution of 2, 4-diacetylphloroglucinol biosynthetic genes among the *Pseudomonas*  
864 spp. reveals unexpected polyphyletism. *Frontiers in microbiology* 8, 1218
- 865 15. Gałazka, Anna, Maria Król, and Andrzej Perzyński. "The efficiency of rhizosphere  
866 bioremediation with *Azospirillum* sp. and *Pseudomonas stutzeri* in soils freshly  
867 contaminated with PAHs and diesel fuel." *Polish Journal of Environmental Studies* 21.2  
868 (2012).
- 869 16. Resendis-Antonio O, Reed JL, Encarnación S, Collado-Vides J, Palsson BØ (2007)  
870 Metabolic Reconstruction and Modeling of Nitrogen Fixation in *Rhizobium etli*. *PLoS*  
871 *Comput Biol* 3(10): e192. <https://doi.org/10.1371/journal.pcbi.0030192>
- 872 17. Kannika Duangmal, Alan C. Ward, Michael Goodfellow, Selective isolation of members  
873 of the *Streptomyces violaceoruber* clade from soil, *FEMS Microbiology Letters*, Volume  
874 245, Issue 2, April 2005, Pages 321–327, <https://doi.org/10.1016/j.femsle.2005.03.028>
- 875 18. Parnell JJ, Park J, Denev V, et al. Coping with polychlorinated biphenyl (PCB) toxicity:  
876 Physiological and genome-wide responses of *Burkholderia xenovorans* LB400 to PCB-  
877 mediated stress. *Appl Environ Microbiol.* 2006;72(10):6607-6614.  
878 doi:10.1128/AEM.01129-06
